# Supplementary material for: Neuronal Dynamics of Pain in Parkinson’s Disease
Source: MDPI journal article supplement (doi:10.3390/brainsci11091224), 2021-09-16
Supplement: s1 [file s1]

Figure S1

Patient 1

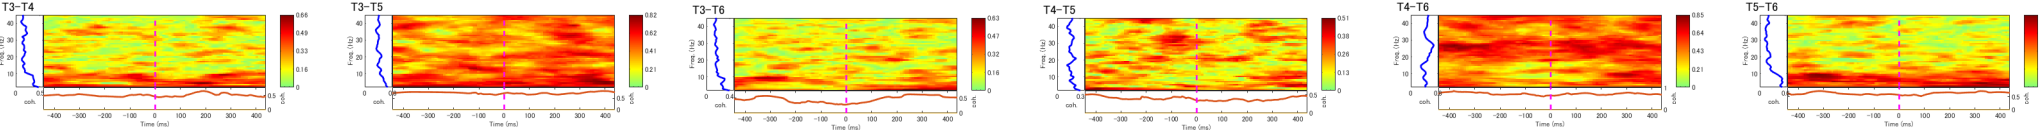

Patient 2

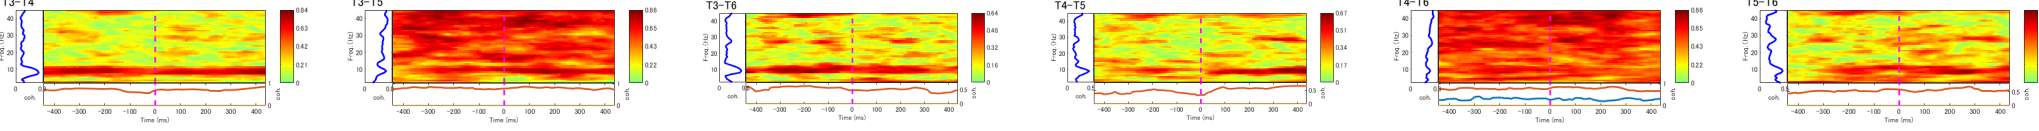

Patient 3

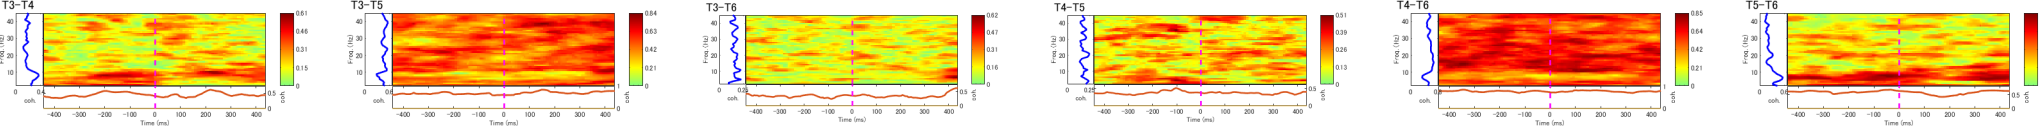

Patient 4

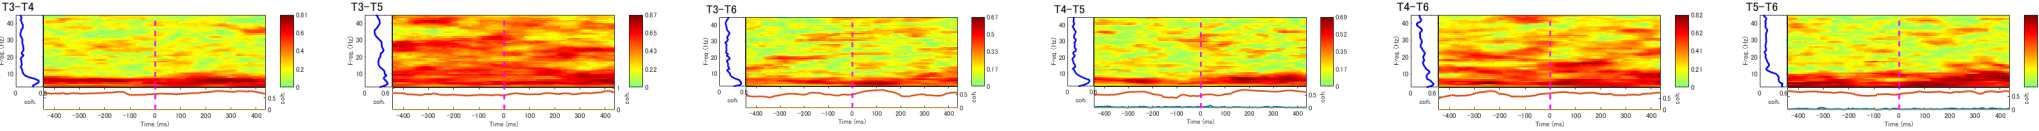

Patient 5

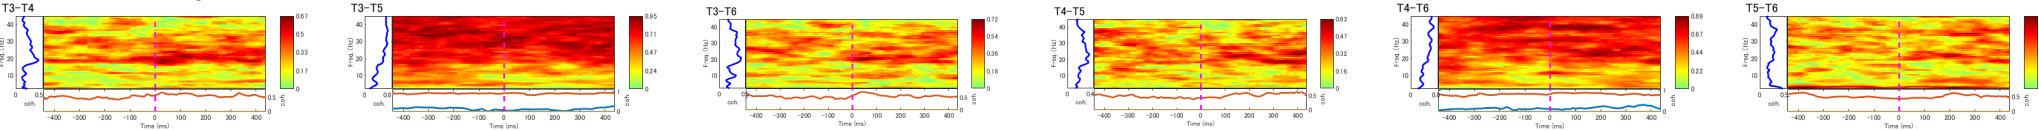

Patient 6

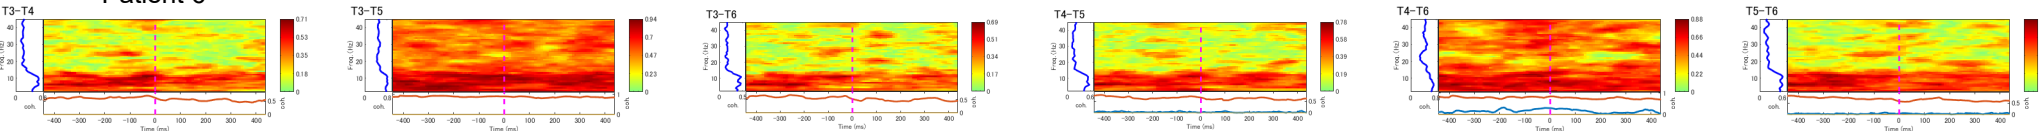

(continued)

Figure S1  
(continued)

Patient 7

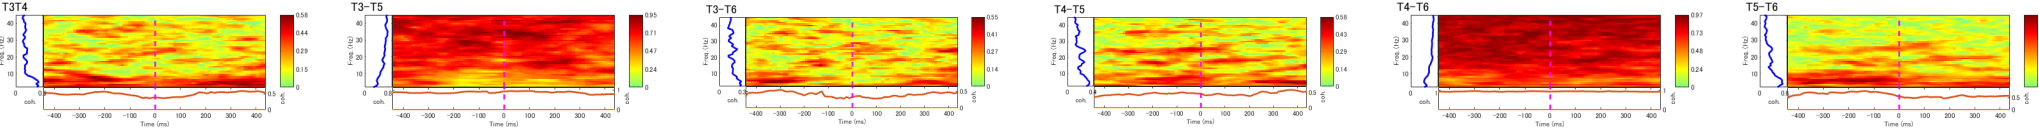

Patient 8

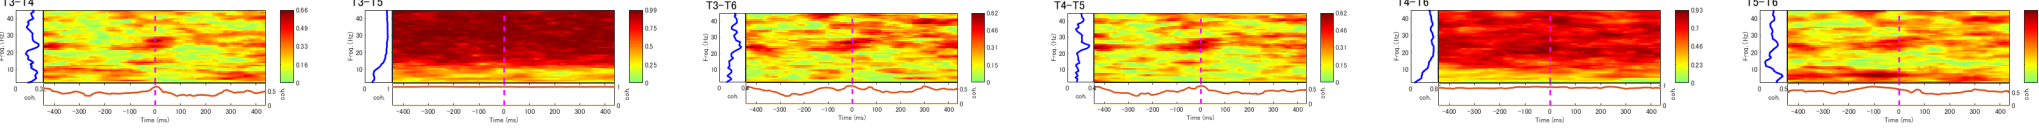

Patient 9

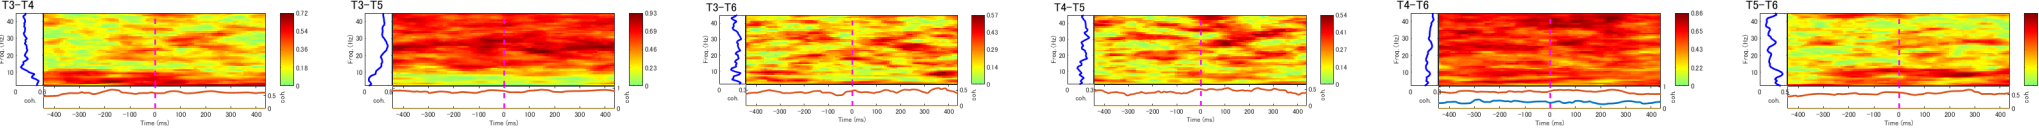

Patient 10

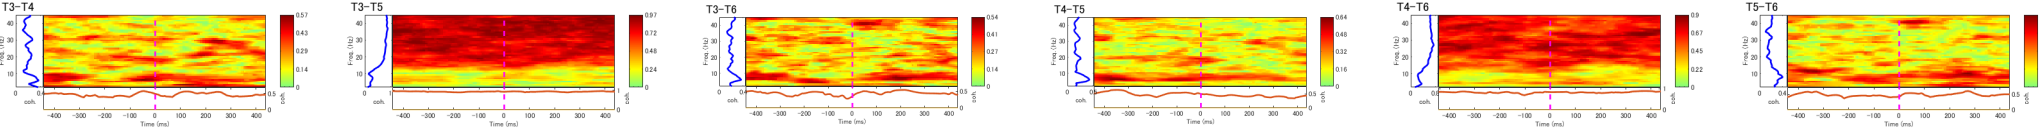

Patient 11

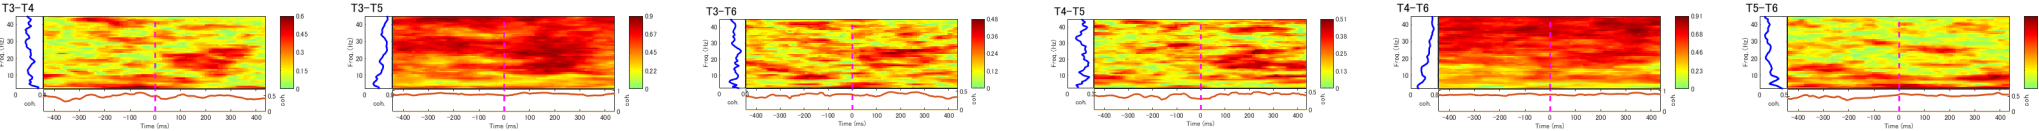

Patient 12

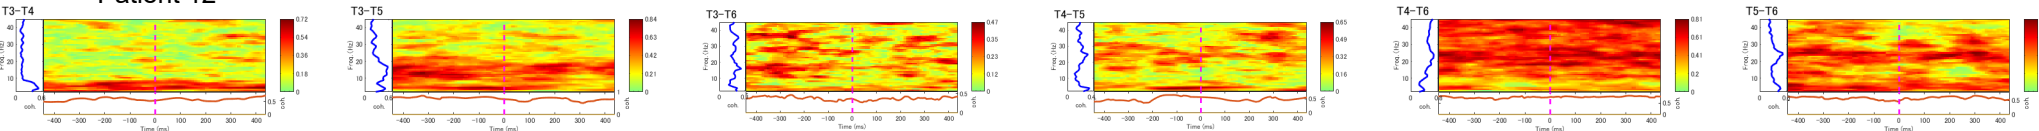

(continued)

Figure S1  
(continued)

Patient 13

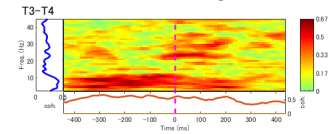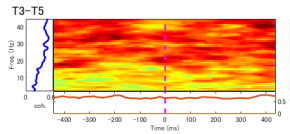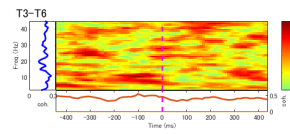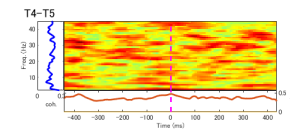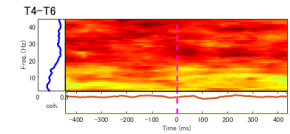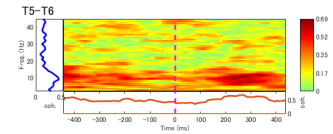

Patient 14

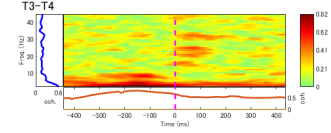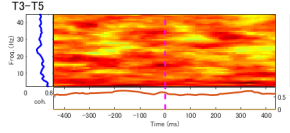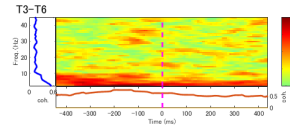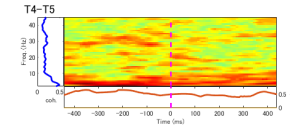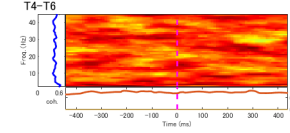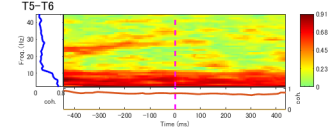

Patient 15

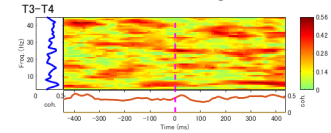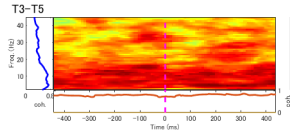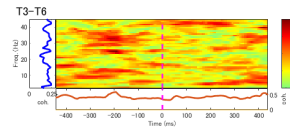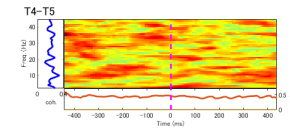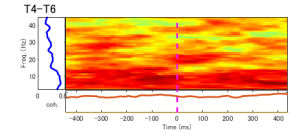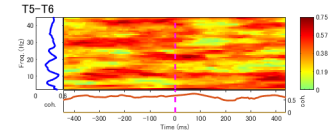

Patient 16

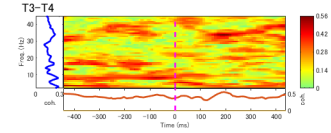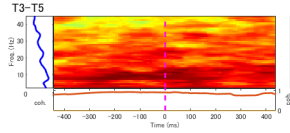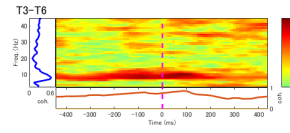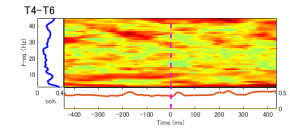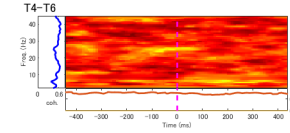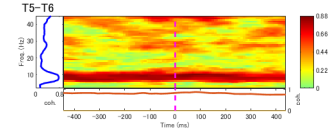

Patient 17

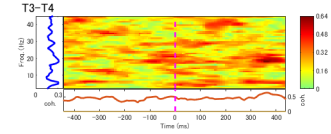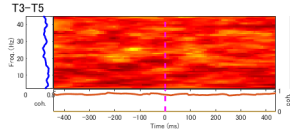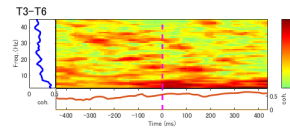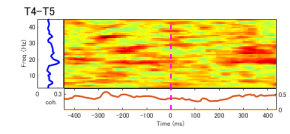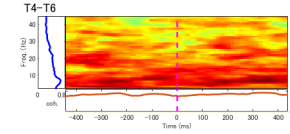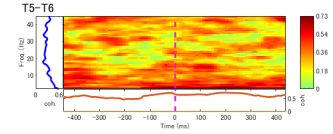

Patient 18

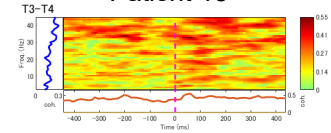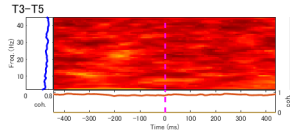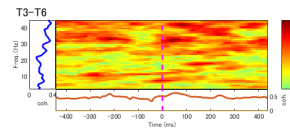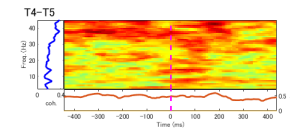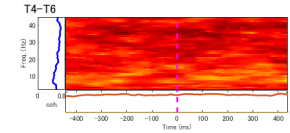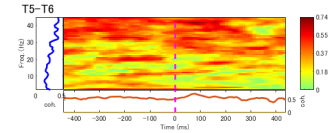

(continued)

Figure S1  
(continued)

Patient 19

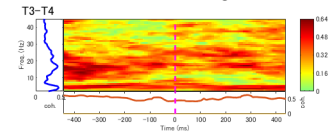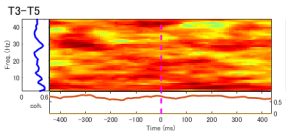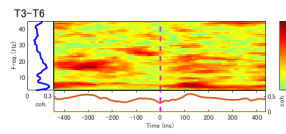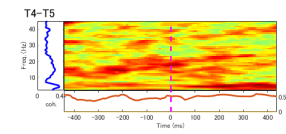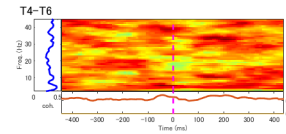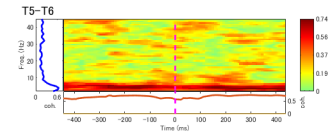

Patient 20

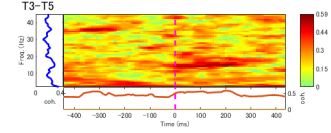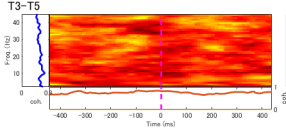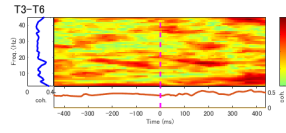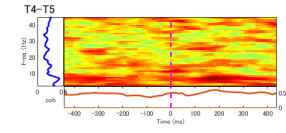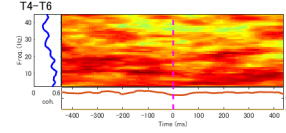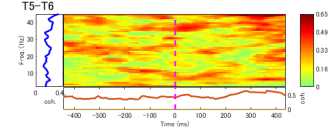

Patient 21

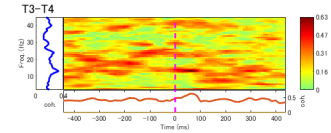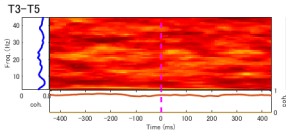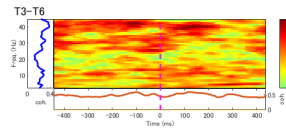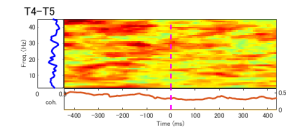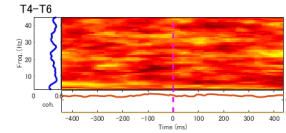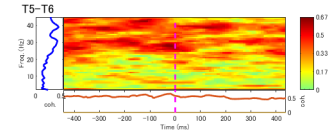

Patient 22

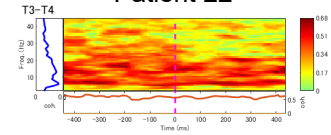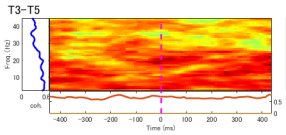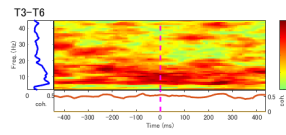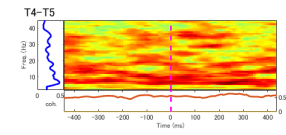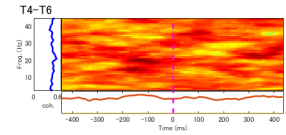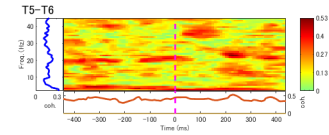

Patient 23

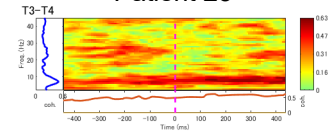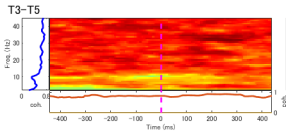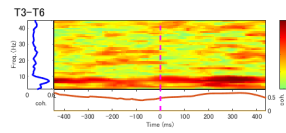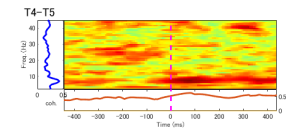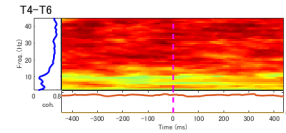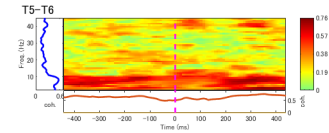

Patient 24

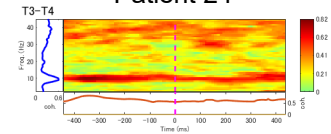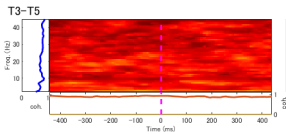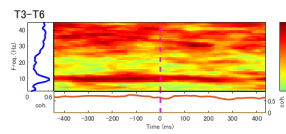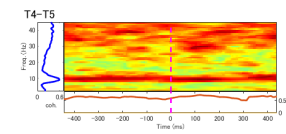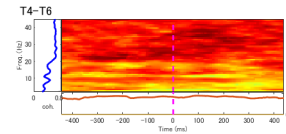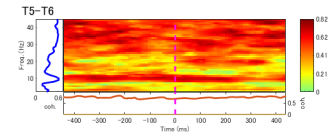

Figure S1: Time frequency and coherence analysis on EEG data. Each plot shows the coherence value across temporal regions (T3-T4, T3-T5, T3-T6, T4-T5, T4-T6, T5-T6) at each time (horizontal line) and each frequency (vertical line) of all 24 patients.
